# Supplementary material
Source: PubMed Central journal article supplement (PMC2905527)
Supplement: NIHMS208413-supplement-Supp1.pdf [file NIHMS208413-supplement-Supp1.pdf]

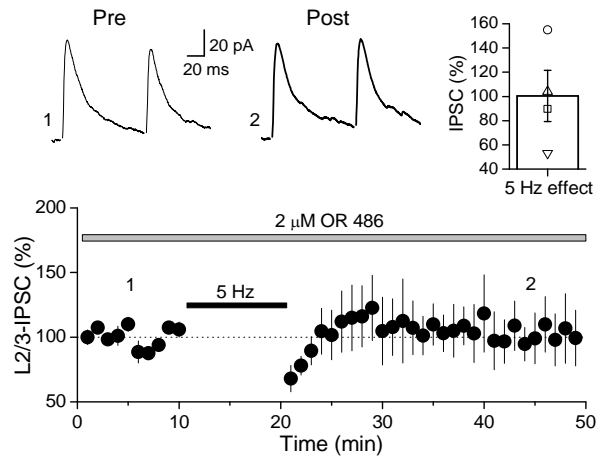

**Fig. S1**  
Chiu et al.

**Figure S1. Increasing endogenous DA levels by inhibiting COMT alone does not trigger I-LTD.** 5 Hz-stimulation in the presence of COMT inhibitor OR 486 alone, with intact D1R and D2R function, does not produce apparent long-lasting depression (n=4). Top left, representative average traces from a single experiment obtained at time points indicated. Top right, plot of the IPSC average IPSC amplitude post train for each experiment (white symbols) and the average for all experiments (bar), demonstrating the variability of results without application of the D1R antagonist SCH23390.
